# Supplementary material for: China rose-derived tri-heteroatom co-doped porous carbon as an efficient electrocatalysts for oxygen reduction reaction
Source: Royal Society of Chemistry journal article supplement (doi:10.1039/c6ra14619h), 2016-01-01
Supplement: c6ra14619h1.pdf [file c6ra14619h1.pdf]

## Supporting information

### China Rose-Derived Tri-heteroatom Co-doped Porous Carbon as an Efficient Electrocatalysts for Oxygen Reduction Reaction

Table S1. The XPS elemental analyses of RPC-D, RPC-A and RPC-M.

|       | Fresh rose | RPC-D | RPC-A | RPC-M |
|-------|------------|-------|-------|-------|
| C1s   | 69.39      | 89.62 | 93.67 | 88.64 |
| N1s   | 2.96       | 1.19  | 0.49  | 3.80  |
| O1s   | 23.4       | 7.69  | 4.86  | 7.40  |
| S2p   | 0.95       | 0.7   | 0.09  | 0.06  |
| Metal | 3.3        | 0     | 0     | 0     |

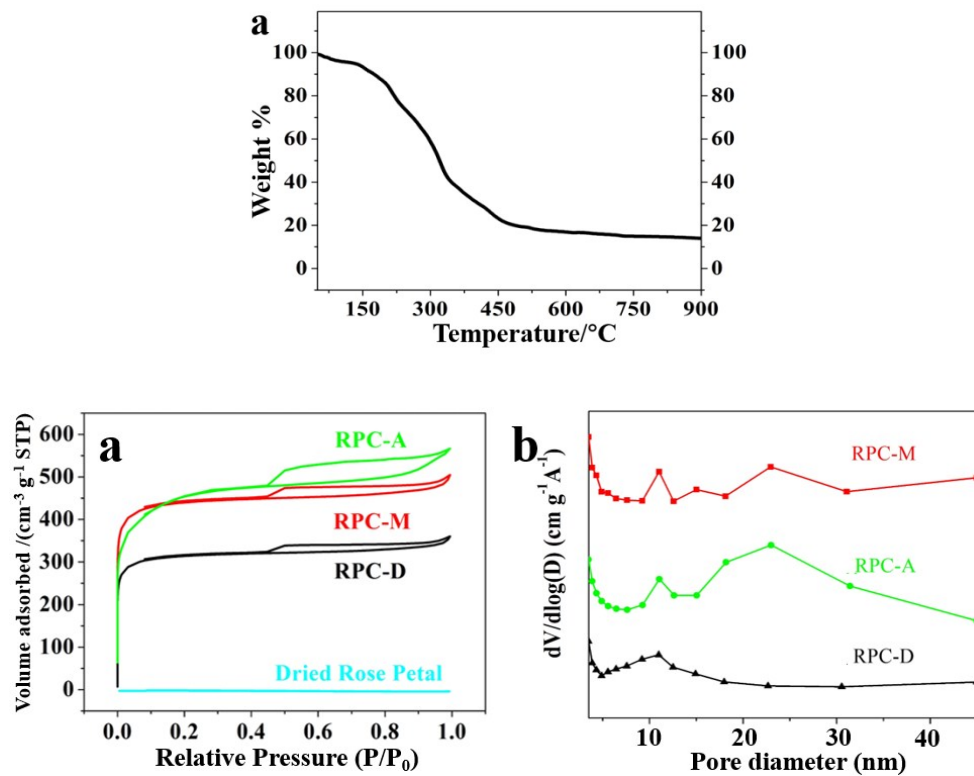

Figure S1. (a) Thermogravimetric analysis of the dried rose petal. (b) The Nitrogen adsorption-desorption isotherms of RPC-D, RPC-A, RPC-M and dried rose petal. (c) The corresponding pore-size distribution of RPC-D, RPC-A and RPC-M by analysis of adsorption branch using Barrett-Joyner-Halenda (BJH) method.

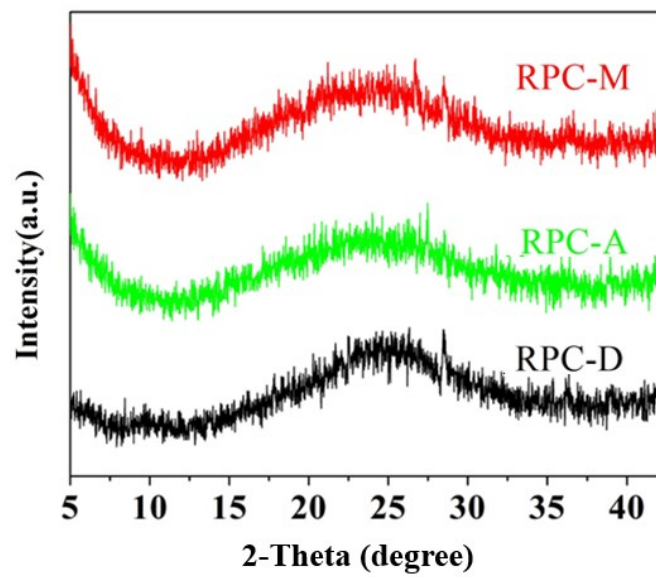

Figure S2. XRD patterns of RPC-D, RPC-A and RPC-M.

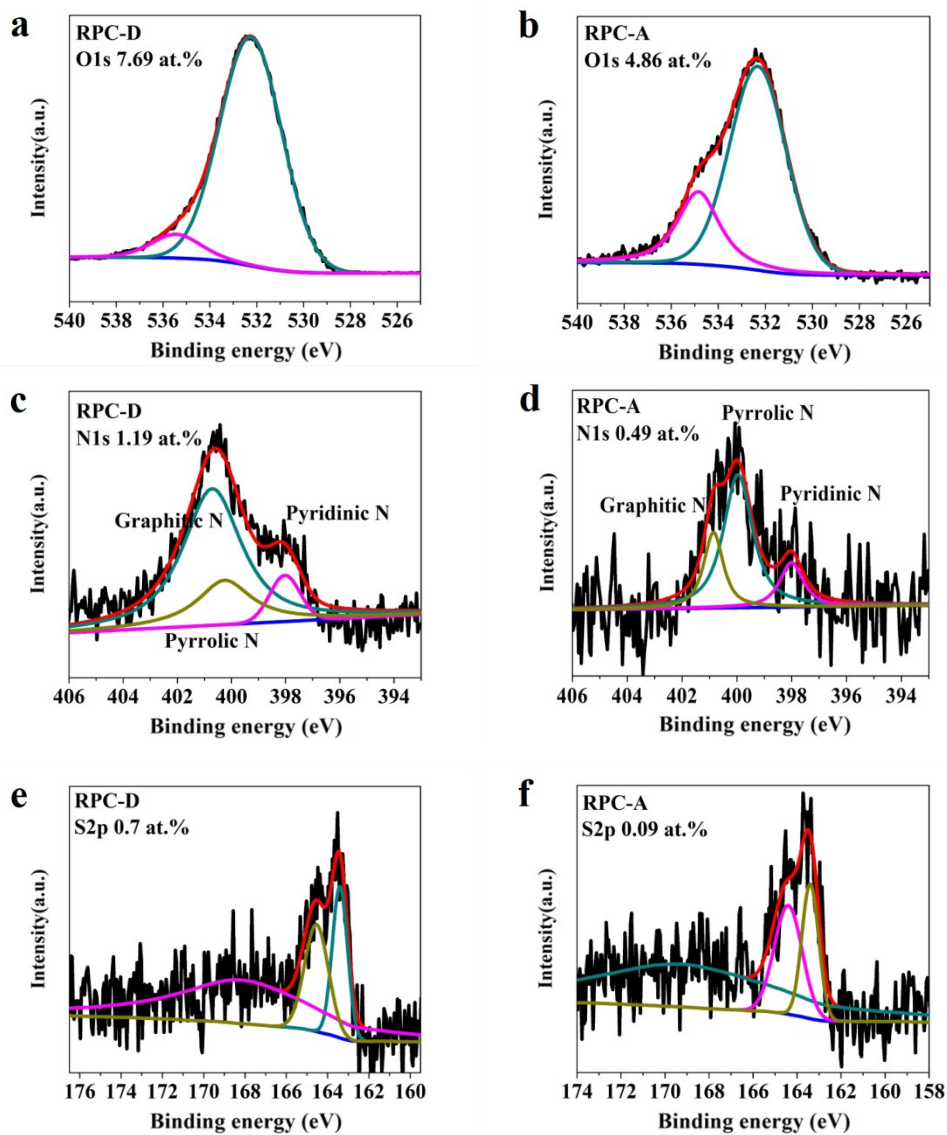

Figure S3.(a-f) The high resolution XPS O1s, N1s and S2p core level spectra of RPC-D and PRC-A.

Table S2. The contents of different types of nitrogen in RPC-D, RPC-A and RPC-M.

|             | RPC-D | RPC-A | RPC-M |
|-------------|-------|-------|-------|
| Pyridinic N | 28.45 | 16.35 | 8.76  |
| Pyrrolic N  | 0     | 60.56 | 22.38 |
| Graphitic N | 66.48 | 23.09 | 68.86 |
| Oxidized N  | 5.07  | 0     | 0     |

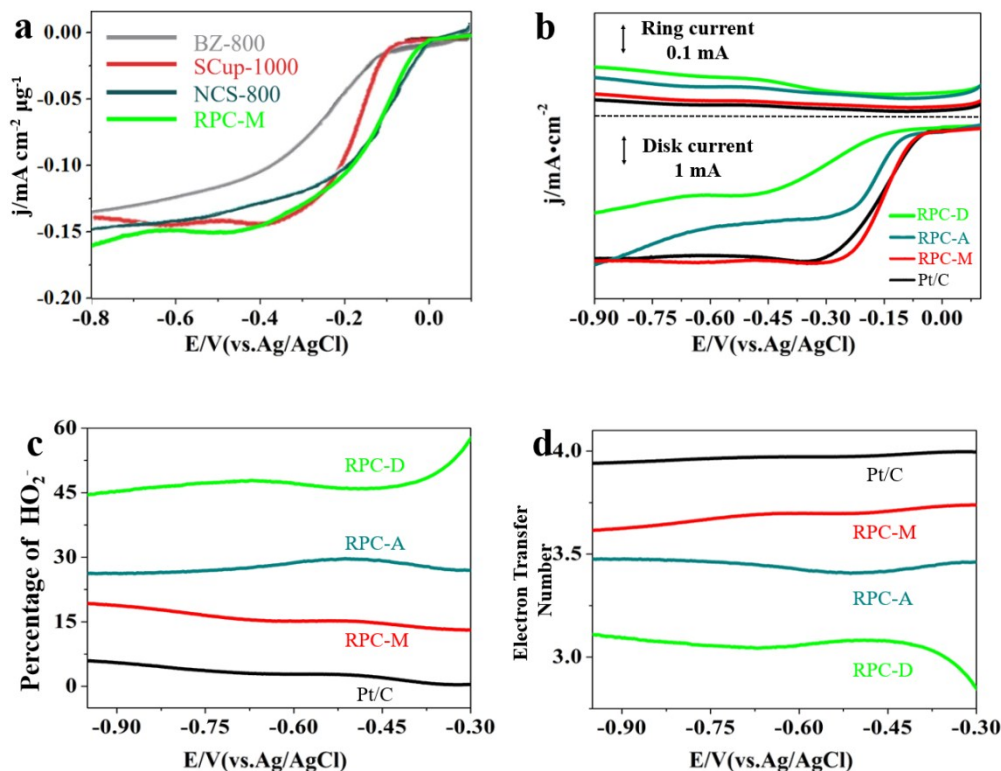

Figure S4. (a) The comparison of LSV curves for RPC-M and other biomass-derived catalysts<sup>30, 41, 44</sup> on a glassy carbon rotating disk electrode (RDE) in O<sub>2</sub> saturated 0.1 M KOH solution at the sweep rate of 10 mVs<sup>-1</sup> with the rotation speed of 1600 rpm. (b) RRDE voltammograms for ORR of RPC-D, RPC-A, RPC-M and commercial Pt/C in O<sub>2</sub>-saturated 0.1 M KOH solution, with the rotation speed of 1600 rpm and sweep rate of 10 mV s<sup>-1</sup>. (c) The HO<sub>2</sub><sup>-</sup> yield and (d) electron transfer number obtained from RRDE curves for RPC-D, RPC-A, RPC-M and commercial Pt/C.

Table S3. The half-wave potentials and limit current densities per loading mass for NCS-800<sup>30</sup>, Scup-1000<sup>41</sup>, BZ-800<sup>44</sup> and RPC-M.

|           | half-wave potential<br>V (vs. Ag/AgCl) | current density<br>mA cm <sup>-2</sup> μg <sup>-1</sup> |
|-----------|----------------------------------------|---------------------------------------------------------|
| NCS-800   | -0.26                                  | 0.131                                                   |
| Scup-1000 | -0.19                                  | 0.137                                                   |
| NCS-800   | -0.16                                  | 0.146                                                   |
| RPC-M     | -0.15                                  | 0.161                                                   |

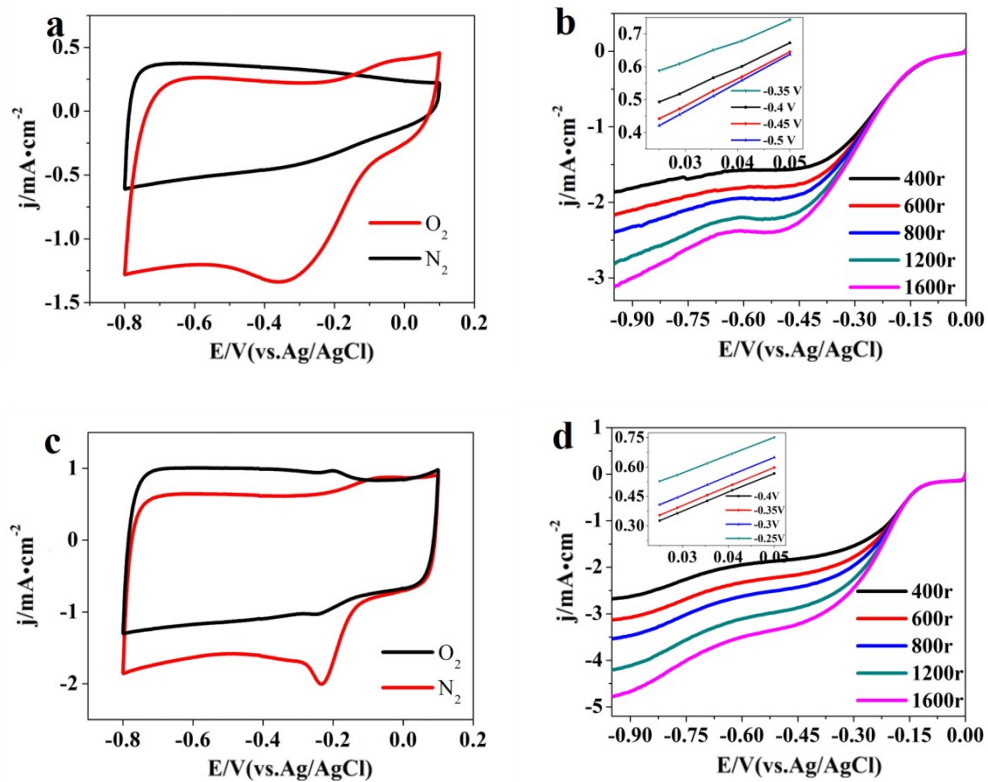

Figure S5. The CV and LSV curves of RPC-D (a, b) and RPC-A (c, d) in  $\text{N}_2$  (black lines) or  $\text{O}_2$ -saturated (red lines) 0.1 M KOH solutions. The sweep rate of CV is  $50 \text{ mV s}^{-1}$  and LSV is  $10 \text{ mV s}^{-1}$ . Inset: K-L plots.
